# Supplementary material for: Long-Term Survivability of Tardigrade Paramacrobiotus experimentalis (Eutardigrada) at Increased Magnesium Perchlorate Levels: Implications for Astrobiological Research
Source: MDPI journal article supplement (doi:10.3390/life14030335), 2024-03-04
Supplement: s1 [file s1]

**Supplementary Material for article**  
**“Long-term survivability of tardigrade *Paramacrobiotus experimentalis* (Eutardigrada) at increased perchlorate levels: Implications for astrobiological research”**  
**by Paulina Anna Wilanowska, Piotr Rzymiski, Łukasz Kaczmarek**

**Table S1.** The body length of the *Pam. experimentalis* specimens in different perchlorate solutions and control at the end of the experiment.

| <b>Control</b><br><b>[μm]</b> | <b>0.10%</b><br><b>[μm]</b> | <b>0.15%</b><br><b>[μm]</b> | <b>0.20%</b><br><b>[μm]</b> | <b>0.25%</b><br><b>[μm]</b> |
|-------------------------------|-----------------------------|-----------------------------|-----------------------------|-----------------------------|
| 646.1                         | 490.7                       | 437.3                       | 467.0                       | 367.6                       |
| 524.6                         | 444.7                       | 469.2                       | 413,2                       | 411.6                       |
| 558.7                         | 519.3                       | 409.2                       | 404.3                       | 430.7                       |
| 569.6                         | 482.3                       | 300.7                       | 394.3                       | 374.3                       |
| 575.6                         | 519.0                       | 381.4                       | 356.3                       | 443.9                       |
| 761.9                         | 460.4                       | 334.0                       | 317.8                       | 393.3                       |
| 773.6                         | 463.9                       | 331.0                       | 327.9                       |                             |
| 754.6                         | 546.8                       | 457.7                       |                             |                             |
| 570.5                         | 396.3                       | 436.7                       |                             |                             |
| 749.2                         | 431.2                       | 419.7                       |                             |                             |
| 592.7                         | 465.0                       | 461.7                       |                             |                             |
| 594.2                         | 454.4                       | 407.6                       |                             |                             |
| 746.3                         | 417.5                       | 439.4                       |                             |                             |
| 752.0                         | 392.8                       | 412.5                       |                             |                             |
| 791.59                        | 482.3                       |                             |                             |                             |
| 677.66                        | 488.4                       |                             |                             |                             |
| 710.96                        | 466.9                       |                             |                             |                             |
| 526.1                         | 422.1                       |                             |                             |                             |
| 657.3                         | 420.0                       |                             |                             |                             |
| 716.5                         | 526.1                       |                             |                             |                             |
| 721.4                         |                             |                             |                             |                             |
